# Supplementary material
Source: publisher site journal article supplement (https://www.spandidos-publications.com/3964/downloadSupplementary)
Supplement: Supplementary file 1 [file downloadSupplementary]

## Sheet: Supplementary_table3_DMM_202007
6.3.67.0	PamGrid Version	QuantitationType	TCC4_data_analysisDate	Sun, 19 Jan 2020 09:52:07 GMT
Table SII. Raw data representing the phosphorylation intensity of each peptide
Description	Array ID	Uniprot ID	Sequence	Position	NCC-DMM1-C1	Original tumor tissue
Protein 4.1 (Band 4.1) (P4.1) (EPB4.1) (4.1R).	41_654_666	P11171	LDGENIYIRHSNL	[660]	107.208	98.4245
Acetylcholine receptor subunit delta precursor.	ACHD_383_395	Q07001	YISKAEEYFLLKS	[383, 390]	26.5472	1
Annexin A1 (Annexin-1) (Annexin I) (Lipocortin I) (Calpactin II)(Chromobindin-9) (p35) (Phospholipase A2 inhibitory protein).	ANXA1_14_26	P04083	IENEEQEYVQTVK	[21]	38.6887	42.3679
NA	ART_004_EAIYAAPFAKKKXC	NA	EAIYAAPFAKKK	NA	938.302	455.104
Band 3 anion transport protein (Anion exchange protein 1) (AE 1)(Solute carrier family 4 member 1) (CD233 antigen).	B3AT_39_51	P02730	TEATATDYHTTSH	[46]	5.93396	1.26415
Calmodulin (CaM).	CALM_95_107	P62158	KDGNGYISAAELR	[100]	14.8679	1
E3 ubiquitin-protein ligase CBL (EC 6.3.2.-) (Signal transductionprotein CBL) (Proto-oncogene c-CBL) (Casitas B-lineage lymphoma proto-oncogene) (RING finger protein 55).	CBL_693_705	P22681	EGEEDTEYMTPSS	[700]	17.6321	41.2075
T-cell surface glycoprotein CD3 zeta chain precursor (T-cell receptorT3 zeta chain) (CD247 antigen).	CD3Z_116_128	P20963	KDKMAEAYSEIGM	[123]	11.7925	11.4528
B-cell antigen receptor complex-associated protein alpha-chainprecursor (Ig-alpha) (MB-1 membrane glycoprotein) (Surface IgM-associated protein) (Membrane-bound immunoglobulin-associated protein)(CD79a antigen).	CD79A_181_193	P11912	EYEDENLYEGLNL	[182, 188]	3982.18	2739.73
Cell division protein kinase 2 (EC 2.7.11.22) (p33 protein kinase).	CDK2_8_20	P24941	EKIGEGTYGVVYK	[15, 19]	202.547	190.736
Cell division protein kinase 7 (EC 2.7.11.22) (EC 2.7.11.23) (CDK-activating kinase) (CAK) (TFIIH basal transcription factor complexkinase subunit) (39 kDa protein kinase) (P39 Mo15) (STK1) (CAK1).	CDK7_157_169	P50613	GLAKSFGSPNRAY	[169]	12.5943	1
Proto-oncogene C-crk (p38) (Adapter molecule crk).	CRK_214_226	P46108	GPPEPGPYAQPSV	[221]	8.84906	2.09434
Catenin beta-1 (Beta-catenin).	CTNB1_79_91	P35222	VADIDGQYAMTRA	[86]	28.4717	20.8585
Neuronal migration protein doublecortin (Lissencephalin-X) (Lis-X)(Doublin).	DCX_109_121	O43602	GIVYAVSSDRFRS	[112]	57.9434	8.23585
Dual specificity tyrosine-phosphorylation-regulated kinase 1A(EC 2.7.12.1) (Protein kinase minibrain homolog) (MNBH) (HP86) (Dualspecificity YAK1-related kinase) (hMNB).	DYR1A_312_324	Q13627	CQLGQRIYQYIQS	[319, 321]	32.1415	5.77358
Embryonal Fyn-associated substrate (HEFS).	EFS_246_258	O43281	GGTDEGIYDVPLL	[253]	1540.6	537.934
Epidermal growth factor receptor precursor (EC 2.7.10.1) (Receptortyrosine-protein kinase ErbB-1).	EGFR_1103_1115	P00533	GSVQNPVYHNQPL	[1110]	12.9057	1.35849
Epidermal growth factor receptor precursor (EC 2.7.10.1) (Receptortyrosine-protein kinase ErbB-1).	EGFR_1165_1177	P00533	ISLDNPDYQQDFF	[1172]	45	11.8774
Epidermal growth factor receptor precursor (EC 2.7.10.1) (Receptortyrosine-protein kinase ErbB-1).	EGFR_1190_1202	P00533	STAENAEYLRVAP	[1197]	23.6038	3.48113
Gamma-enolase (EC 4.2.1.11) (2-phospho-D-glycerate hydro-lyase)(Neural enolase) (Neuron-specific enolase) (NSE) (Enolase 2).	ENOG_37_49	P09104	SGASTGIYEALEL	[44]	2361	605.83
Ephrin type-A receptor 1 precursor (EC 2.7.10.1) (Tyrosine-proteinkinase receptor EPH).	EPHA1_774_786	P21709	LDDFDGTYETQGG	[781]	95.5566	87.8585
Ephrin type-A receptor 2 precursor (EC 2.7.10.1) (Tyrosine-proteinkinase receptor ECK) (Epithelial cell kinase).	EPHA2_765_777	P29317	EDDPEATYTTSGG	[772]	151.009	126.028
Ephrin type-A receptor 4 precursor (EC 2.7.10.1) (Tyrosine-proteinkinase receptor SEK) (Receptor protein-tyrosine kinase HEK8)(Tyrosine-protein kinase TYRO1).	EPHA4_589_601	P54764	LNQGVRTYVDPFT	[596]	30.4717	1
Ephrin type-A receptor 7 precursor (EC 2.7.10.1) (Tyrosine-proteinkinase receptor EHK-3) (EPH homology kinase 3) (Receptor protein-tyrosine kinase HEK11).	EPHA7_607_619	Q15375	TYIDPETYEDPNR	[608, 614]	137.717	50.4623
Ephrin type-B receptor 1 precursor (EC 2.7.10.1) (Tyrosine-proteinkinase receptor EPH-2) (NET) (HEK6) (ELK).	EPHB1_771_783	P54762	DDTSDPTYTSSLG	[778]	105.972	65.2359
Ephrin type-B receptor 1 precursor (EC 2.7.10.1) (Tyrosine-proteinkinase receptor EPH-2) (NET) (HEK6) (ELK).	EPHB1_921_933	P54762	SAIKMVQYRDSFL	[928]	31.9623	1
Ephrin type-B receptor 4 precursor (EC 2.7.10.1) (Tyrosine-proteinkinase receptor HTK) (Tyrosine-protein kinase TYRO11).	EPHB4_583_595	P54760	IGHGTKVYIDPFT	[590]	14.9623	1
Erythropoietin receptor precursor (EPO-R).	EPOR_361_373	P19235	SEHAQDTYLVLDK	[368]	59.9811	35.2925
Erythropoietin receptor precursor (EPO-R).	EPOR_419_431	P19235	ASAASFEYTILDP	[426]	61.2076	9.73585
Receptor tyrosine-protein kinase erbB-2 precursor (EC 2.7.10.1)(p185erbB2) (C-erbB-2) (NEU proto-oncogene) (Tyrosine kinase-type cellsurface receptor HER2) (MLN 19) (CD340 antigen).	ERBB2_1241_1253	P04626	PTAENPEYLGLDV	[1248]	38.3679	20.0377
Receptor tyrosine-protein kinase erbB-2 precursor (EC 2.7.10.1)(p185erbB2) (C-erbB-2) (NEU proto-oncogene) (Tyrosine kinase-type cellsurface receptor HER2) (MLN 19) (CD340 antigen).	ERBB2_870_882	P04626	LDIDETEYHADGG	[877]	12.217	15.3585
Focal adhesion kinase 1 (EC 2.7.10.2) (FADK 1) (pp125FAK) (Protein-tyrosine kinase 2).	FAK1_569_581	Q05397	RYMEDSTYYKASK	[570, 576, 577]	66.1792	22.2925
Protein tyrosine kinase 2 beta (EC 2.7.10.2) (Focal adhesion kinase 2)(FADK 2) (Proline-rich tyrosine kinase 2) (Cell adhesion kinase beta)(CAK beta) (Calcium-dependent tyrosine kinase) (CADTK) (Relatedadhesion focal tyrosine kinase) (RAFTK).	FAK2_572_584	Q14289	RYIEDEDYYKASV	[573, 579, 580]	192.377	51.6887
Proto-oncogene tyrosine-protein kinase FER (EC 2.7.10.2) (p94-FER) (c-FER) (Tyrosine kinase 3).	FER_707_719	P16591	RQEDGGVYSSSGL	[714]	113.255	52.9057
Proto-oncogene tyrosine-protein kinase Fes/Fps (EC 2.7.10.2) (C-Fes).	FES_706_718	P07332	REEADGVYAASGG	[713]	195.519	88.7359
Basic fibroblast growth factor receptor 1 precursor (EC 2.7.10.1)(FGFR-1) (bFGF-R) (Fms-like tyrosine kinase 2) (c-fgr) (CD331antigen).	FGFR1_761_773	P11362	TSNQEYLDLSMPL	[766]	36.3491	1.09434
Fibroblast growth factor receptor 2 precursor (EC 2.7.10.1) (FGFR-2)(Keratinocyte growth factor receptor 2) (CD332 antigen).	FGFR2_762_774	P21802	TLTTNEEYLDLSQ	[769]	88.8302	29.3491
Fibroblast growth factor receptor 3 precursor (EC 2.7.10.1) (FGFR-3)(CD333 antigen).	FGFR3_753_765	P22607	TVTSTDEYLDLSA	[760]	72.5566	16.6038
Tyrosine-protein kinase FRK (EC 2.7.10.2) (FYN-related kinase)(Nuclear tyrosine protein kinase RAK).	FRK_380_392	P42685	KVDNEDIYESRHE	[387]	400.726	209.528
Insulin receptor precursor (EC 2.7.10.1) (IR) (CD220 antigen)[Contains: Insulin receptor subunit alpha; Insulin receptor subunitbeta].	INSR_1348_1360	P06213	SLGFKRSYEEHIP	[1355]	12.8208	3.69811
Insulin receptor precursor (EC 2.7.10.1) (IR) (CD220 antigen)[Contains: Insulin receptor subunit alpha; Insulin receptor subunitbeta].	INSR_992_1004	P06213	YASSNPEYLSASD	[992, 999]	19.0566	1
Tyrosine-protein kinase JAK1 (EC 2.7.10.2) (Janus kinase 1) (JAK-1).	JAK1_1015_1027	P23458	AIETDKEYYTVKD	[1022, 1023]	69.4811	31.566
Tyrosine-protein kinase JAK2 (EC 2.7.10.2) (Janus kinase 2) (JAK-2).	JAK2_563_577	O60674	VRREVGDYGQLHETE	[570]	54.6038	25.8679
Keratin, type II cytoskeletal 6B (Cytokeratin-6B) (CK 6B) (K6bkeratin).	K2C6B_53_65	P04259	GAGFGSRSLYGLG	[62]	86.6604	17.0943
Keratin, type II cytoskeletal 8 (Cytokeratin-8) (CK-8) (Keratin-8)(K8).	K2C8_425_437	P05787	SAYGGLTSPGLSY	[427, 437]	14.6132	7.83962
Tyrosine-protein kinase SYK (EC 2.7.10.2) (Spleen tyrosine kinase).	KSYK_518_530	P43405	ALRADENYYKAQT	[525, 526]	70.0566	8.06604
Linker for activation of T-cells family member 1 (36 kDa phospho-tyrosine adapter protein) (pp36) (p36-38).	LAT_194_206	O43561	MESIDDYVNVPES	[200]	57.849	10.8868
Linker for activation of T-cells family member 1 (36 kDa phospho-tyrosine adapter protein) (pp36) (p36-38).	LAT_249_261	O43561	EEGAPDYENLQEL	[255]	286.519	79.0566
Proto-oncogene tyrosine-protein kinase LCK (EC 2.7.10.2) (p56-LCK)(Lymphocyte cell-specific protein-tyrosine kinase) (LSK) (T cell-specific protein-tyrosine kinase).	LCK_387_399	P06239	RLIEDNEYTAREG	[394]	36.0943	30.7359
Myelin basic protein (MBP) (Myelin A1 protein) (Myelin membraneencephalitogenic protein).	MBP_198_210	P02686	ARTAHYGSLPQKS	[203]	54.5377	19.5189
Myelin basic protein (MBP) (Myelin A1 protein) (Myelin membraneencephalitogenic protein).	MBP_259_271	P02686	FGYGGRASDYKSA	[261, 268]	23.6415	2.48113
Hepatocyte growth factor receptor precursor (EC 2.7.10.1) (HGFreceptor) (Scatter factor receptor) (SF receptor) (HGF/SF receptor)(Met proto-oncogene tyrosine kinase) (c-Met).	MET_1227_1239	P08581	RDMYDKEYYSVHN	[1230, 1234, 1235]	121.651	42.3962
Mitogen-activated protein kinase 1 (EC 2.7.11.24) (Extracellular signal-regulated kinase 2) (ERK-2) (Mitogen-activated protein kinase 2) (MAP kinase 2) (MAPK 2) (p42-MAPK) (ERT1).	MK01_180_192	P28482	HTGFLTEYVATRW	[187]	31.7264	1
Mitogen-activated protein kinase 7 (EC 2.7.11.24) (Extracellularsignal-regulated kinase 5) (ERK-5) (ERK4) (BMK1 kinase).	MK07_211_223	Q13164	AEHQYFMTEYVAT	[215, 220]	14.8396	1
Mitogen-activated protein kinase 10 (EC 2.7.11.24) (Stress-activated protein kinase JNK3) (c-Jun N-terminal kinase 3) (MAP kinase p49 3F12).	MK10_216_228	P53779	TSFMMTPYVVTRY	[223, 228]	90.1038	18.1981
Mitogen-activated protein kinase 12 (EC 2.7.11.24) (Extracellularsignal-regulated kinase 6) (ERK-6) (ERK5) (Stress-activated proteinkinase 3) (Mitogen-activated protein kinase p38 gamma) (MAP kinase p38gamma).	MK12_178_190	P53778	ADSEMTGYVVTRW	[185]	27.6604	8.59434
Mitogen-activated protein kinase 14 (EC 2.7.11.24) (Mitogen-activatedprotein kinase p38 alpha) (MAP kinase p38 alpha) (Cytokine suppressiveanti-inflammatory drug-binding protein) (CSAID-binding protein) (CSBP)(MAX-interacting protein 2) (MAP kinase MXI2) (SAPK2A).	MK14_173_185	Q16539	RHTDDEMTGYVAT	[182]	9.51887	1
Neutrophil cytosol factor 1 (NCF-1) (Neutrophil NADPH oxidase factor1) (47 kDa neutrophil oxidase factor) (p47-phox) (NCF-47K) (47 kDaautosomal chronic granulomatous disease protein) (Nox organizer 2)(Nox-organizing protein 2) (SH3 and PX domain-containing protein 1A).	NCF1_313_325	P14598	QRSRKRLSQDAYR	[324]	175.755	51.8113
Sodium-dependent phosphate transport protein 2A (Sodium/phosphatecotransporter 2A) (Na(+)/Pi cotransporter 2A) (Sodium-phosphatetransport protein 2A) (Na(+)-dependent phosphate cotransporter 2A)(NaPi-2a) (Solute carrier family 34 member 1) (NaPi-3).	NPT2A_501_513	Q06495	AKALGKRTAKYRW	[511]	29.0283	7.4717
BDNF/NT-3 growth factors receptor precursor (EC 2.7.10.1)(Neurotrophic tyrosine kinase receptor type 2) (TrkB tyrosine kinase)(GP145-TrkB) (Trk-B).	NTRK2_696_708	Q16620	GMSRDVYSTDYYR	[702, 706, 707]	137.047	30.4057
2-oxoisovalerate dehydrogenase subunit alpha, mitochondrial precursor(EC 1.2.4.4) (Branched-chain alpha-keto acid dehydrogenase E1component alpha chain) (BCKDH E1-alpha) (BCKDE1A).	P12694	DDSSAYRSVDEVN	[345]	1	1
Phosphatidylinositol 3-kinase regulatory subunit alpha (PI3-kinase p85subunit alpha) (PtdIns-3-kinase p85-alpha) (PI3K).	P85A_600_612	P27986	NENTEDQYSLVED	[607]	387.953	88.6509
Paxillin.	PAXI_111_123	P49023	VGEEEHVYSFPNK	[118]	442.028	136.425
Paxillin.	PAXI_24_36	P49023	FLSEETPYSYPTG	[31, 33]	440.208	67.1698
3-phosphoinositide-dependent protein kinase 1 (EC 2.7.11.1) (hPDK1).	PDPK1_2_14	O15530	ARTTSQLYDAVPI	[9]	417.113	121.481
3-phosphoinositide-dependent protein kinase 1 (EC 2.7.11.1) (hPDK1).	PDPK1_369_381	O15530	DEDCYGNYDNLLS	[373, 376]	46.7736	42.2358
Platelet endothelial cell adhesion molecule precursor (PECAM-1)(EndoCAM) (GPIIA') (CD31 antigen).	PECA1_706_718	P16284	KKDTETVYSEVRK	[713]	193.623	114.245
Beta-type platelet-derived growth factor receptor precursor(EC 2.7.10.1) (PDGF-R-beta) (CD140b antigen).	PGFRB_1002_1014	P09619	LDTSSVLYTAVQP	[1009]	110.179	16.6226
Beta-type platelet-derived growth factor receptor precursor(EC 2.7.10.1) (PDGF-R-beta) (CD140b antigen).	PGFRB_1014_1028	P09619	PNEGDNDYIIPLPDP	[1021]	94.5755	86.8679
Beta-type platelet-derived growth factor receptor precursor(EC 2.7.10.1) (PDGF-R-beta) (CD140b antigen).	PGFRB_572_584	P09619	VSSDGHEYIYVDP	[579, 581]	350.896	59.4811
Beta-type platelet-derived growth factor receptor precursor(EC 2.7.10.1) (PDGF-R-beta) (CD140b antigen).	PGFRB_709_721	P09619	RPPSAELYSNALP	[716]	123.491	39.8679
Beta-type platelet-derived growth factor receptor precursor(EC 2.7.10.1) (PDGF-R-beta) (CD140b antigen).	PGFRB_768_780	P09619	SSNYMAPYDNYVP	[771, 775, 778]	70.0943	18.783
Beta-type platelet-derived growth factor receptor precursor(EC 2.7.10.1) (PDGF-R-beta) (CD140b antigen).	PGFRB_771_783	P09619	YMAPYDNYVPSAP	[771, 775, 778]	62.9434	4.75472
1-phosphatidylinositol-4,5-bisphosphate phosphodiesterase gamma-1(EC 3.1.4.11) (Phosphoinositide phospholipase C) (PLC-gamma-1)(Phospholipase C-gamma-1) (PLC-II) (PLC-148).	PLCG1_764_776	P19174	IGTAEPDYGALYE	[771, 775]	636.887	183.028
Serine/threonine-protein phosphatase 2A catalytic subunit beta isoform(EC 3.1.3.16) (PP2A-beta).	PP2AB_297_309	P62714	EPHVTRRTPDYFL	[307]	60.1321	8.17924
Progesterone receptor (PR) (Nuclear receptor subfamily 3 group Cmember 3).	PRGR_786_798	P06401	EQRMKESSFYSLC	[795]	20.5377	4.61321
Paired mesoderm homeobox protein 2 (PRX-2) (Paired-related homeoboxprotein 2).	PRRX2_202_214	Q99811	WTASSPYSTVPPY	[208, 214]	130.774	26.5283
Tyrosine-protein phosphatase non-receptor type 11 (EC 3.1.3.48)(Protein-tyrosine phosphatase 2C) (PTP-2C) (PTP-1D) (SH-PTP3) (SH-PTP2) (SHP-2) (Shp2).	PTN11_539_551	Q06124	SKRKGHEYTNIKY	[546, 551]	26.3113	5.5566
RAF proto-oncogene serine/threonine-protein kinase (EC 2.7.11.1) (Raf-1) (C-RAF) (cRaf).	RAF1_332_344	P04049	PRGQRDSSYYWEI	[340, 341]	153.642	44.3302
Ras GTPase-activating protein 1 (GTPase-activating protein) (GAP) (Rasp21 protein activator) (p120GAP) (RasGAP).	RASA1_453_465	P20936	TVDGKEIYNTIRR	[460]	107.641	109.377
Retinoblastoma-associated protein (PP110) (P105-RB) (RB).	RB_804_816	P06400	IYISPLKSPYKIS	[805, 813]	28.8868	1
Proto-oncogene tyrosine-protein kinase receptor ret precursor(EC 2.7.10.1) (C-ret).	RET_1022_1034	P07949	TPSDSLIYDDGLS	[1029]	279.387	118.906
Macrophage-stimulating protein receptor precursor (EC 2.7.10.1) (MSPreceptor) (p185-Ron) (CD136 antigen) (CDw136) [Contains: Macrophage-stimulating protein receptor alpha chain; Macrophage-stimulatingprotein receptor beta chain].	RON_1346_1358	Q04912	SALLGDHYVQLPA	[1353]	58.1226	29.8019
Macrophage-stimulating protein receptor precursor (EC 2.7.10.1) (MSPreceptor) (p185-Ron) (CD136 antigen) (CDw136) [Contains: Macrophage-stimulating protein receptor alpha chain; Macrophage-stimulatingprotein receptor beta chain].	RON_1353_1365	Q04912	YVQLPATYMNLGP	[1353, 1360]	38.783	6.96227
Src substrate protein p85 (p80) (Cortactin).	SRC8_CHICK_476_488	Q01406	EYEPETVYEVAGA	[477, 483]	1012.07	287.274
Src substrate protein p85 (p80) (Cortactin).	SRC8_CHICK_492_504	Q01406	YQAEENTYDEYEN	[492, 499, 502]	664.189	265.245
Tyrosine-protein kinase Tec (EC 2.7.10.2).	TEC_512_524	P42680	RYFLDDQYTSSSG	[513, 519]	41.1509	11.4245
Tyrosine-protein kinase receptor TYRO3 precursor (EC 2.7.10.1)(Tyrosine-protein kinase RSE) (Tyrosine-protein kinase SKY) (Tyrosine-protein kinase DTK) (Protein-tyrosine kinase byk).	TYRO3_679_691	Q06418	KIYSGDYYRQGCA	[681, 685, 686]	140.547	35.2925
Vascular endothelial growth factor receptor 1 precursor (EC 2.7.10.1)(VEGFR-1) (Vascular permeability factor receptor) (Tyrosine-proteinkinase receptor FLT) (Flt-1) (Tyrosine-protein kinase FRT) (Fms-liketyrosine kinase 1).	VGFR1_1320_1332_C1320S/C1321S	P17948	SSSPPPDYNSVVL	[1327]	8.06604	1
Vascular endothelial growth factor receptor 1 precursor (EC 2.7.10.1)(VEGFR-1) (Vascular permeability factor receptor) (Tyrosine-proteinkinase receptor FLT) (Flt-1) (Tyrosine-protein kinase FRT) (Fms-liketyrosine kinase 1).	VGFR1_1326_1338	P17948	DYNSVVLYSTPPI	[1327, 1333]	42.5377	15.2925
Vascular endothelial growth factor receptor 2 precursor (EC 2.7.10.1)(VEGFR-2) (Kinase insert domain receptor) (Protein-tyrosine kinasereceptor Flk-1) (CD309 antigen).	VGFR2_1046_1058	P35968	DFGLARDIYKDPD	[1054]	21.7925	4.68868
Vascular endothelial growth factor receptor 2 precursor (EC 2.7.10.1)(VEGFR-2) (Kinase insert domain receptor) (Protein-tyrosine kinasereceptor Flk-1) (CD309 antigen).	VGFR2_1052_1064	P35968	DIYKDPDYVRKGD	[1054, 1059]	39.0849	7.80189
Vascular endothelial growth factor receptor 2 precursor (EC 2.7.10.1)(VEGFR-2) (Kinase insert domain receptor) (Protein-tyrosine kinasereceptor Flk-1) (CD309 antigen).	VGFR2_1168_1180	P35968	AQQDGKDYIVLPI	[1175]	44.1415	18.3113
Vascular endothelial growth factor receptor 2 precursor (EC 2.7.10.1)(VEGFR-2) (Kinase insert domain receptor) (Protein-tyrosine kinasereceptor Flk-1) (CD309 antigen).	VGFR2_944_956	P35968	RFRQGKDYVGAIP	[951]	74.4434	14.2453
Vascular endothelial growth factor receptor 2 precursor (EC 2.7.10.1)(VEGFR-2) (Kinase insert domain receptor) (Protein-tyrosine kinasereceptor Flk-1) (CD309 antigen).	VGFR2_989_1001	P35968	EEAPEDLYKDFLT	[996]	120.943	72.0283
Vascular endothelial growth factor receptor 3 precursor (EC 2.7.10.1)(VEGFR-3) (Tyrosine-protein kinase receptor FLT4).	VGFR3_1061_1073	P35916	DIYKDPDYVRKGS	[1063, 1068]	20.6132	6.09434
Vinculin (Metavinculin).	VINC_815_827	P18206	KSFLDSGYRILGA	[822]	38.6226	1
Tyrosine-protein kinase ZAP-70 (EC 2.7.10.2) (70 kDa zeta-associatedprotein) (Syk-related tyrosine kinase).	ZAP70_485_497	P43403	ALGADDSYYTARS	[492, 493]	67.0566	35.9528
Zinc finger and BTB domain-containing protein 16 (Zinc finger proteinPLZF) (Promyelocytic leukemia zinc finger protein) (Zinc fingerprotein 145).	ZBT16_621_633	Q05516	LRTHNGASPYQCT	[630]	18.283	4.61321
